# Supplementary material for: After Wildfires and Rewetting: Results of 15+ Years’ Monitoring of Vegetation and Environmental Factors in Cutover Peatland
Source: MDPI journal article supplement (doi:10.3390/d15010003), 2022-12-20
Supplement: s1 [file s1]

## Supplementary Materials

**Figure S1.** View of the monitoring plots from different years of observation

### Plot No. 1

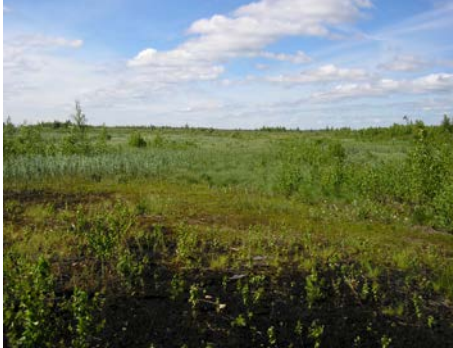

2005. General view of the milling field with the plot

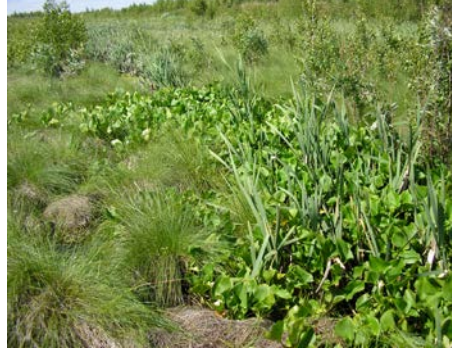

2005. Plant communities: *Calla palustris* – *Typha latifolia* (in the center), *Eriophorum vaginatum* (left), *Betula pubescens* – *Eriophorum vaginatum*

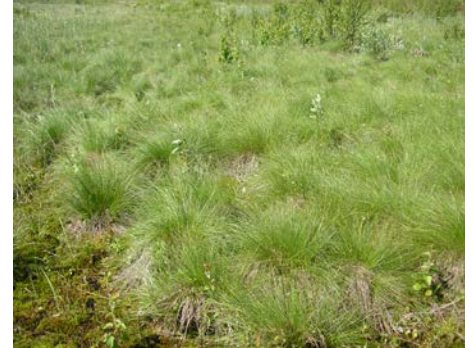

2005. Plant community with *Eriophorum vaginatum*

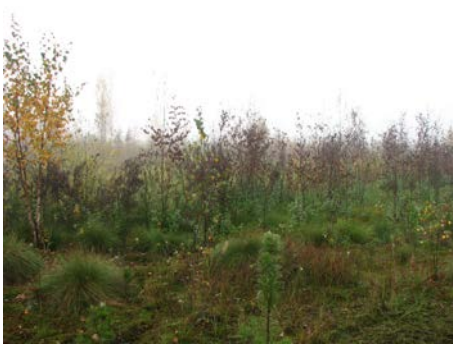

2007. After wildfire

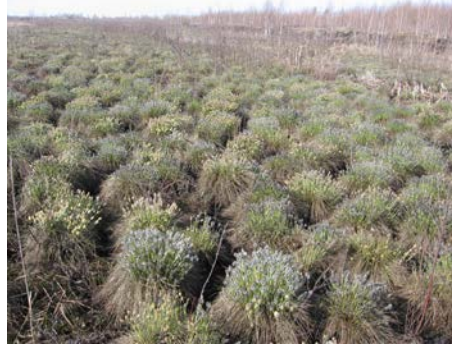

2008. Plant community with *Eriophorum vaginatum*

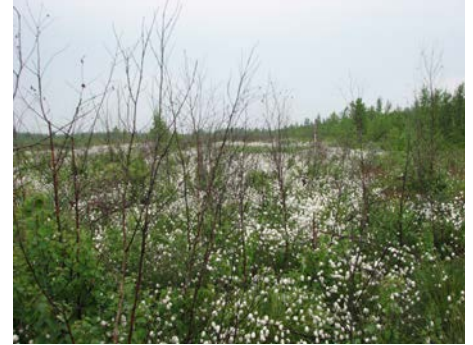

2008. Plant community with *Eriophorum vaginatum*

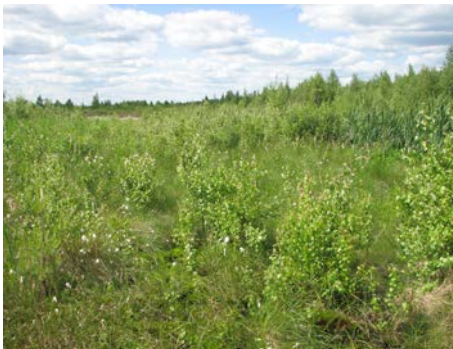

2009. Plant community with *Eriophorum vaginatum*

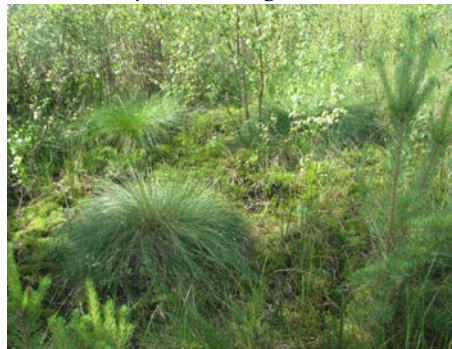

2010. *Betula pubescens* – *Eriophorum vaginatum* – *Polytrichum juniperinum*

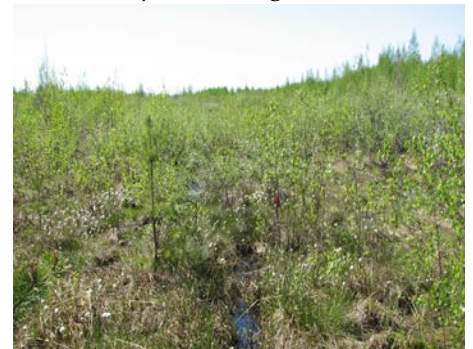

2011. Plant community with *Eriophorum vaginatum*



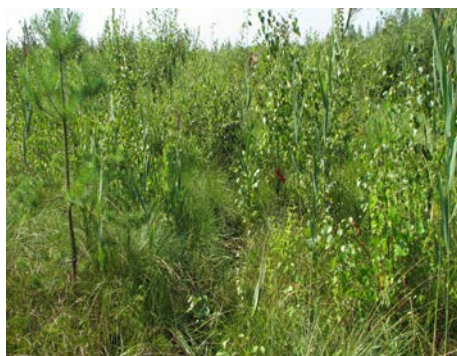

2011. *Betula pubescens* –  
*Eriophorum vaginatum*–  
*Polytrichum juniperinum*

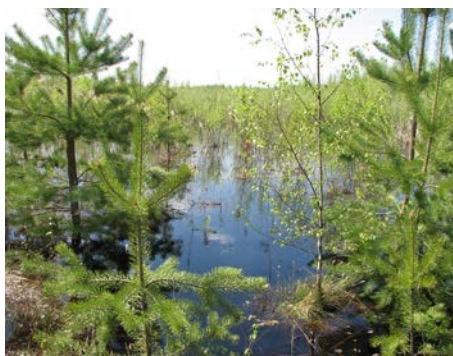

2012. After rewetting

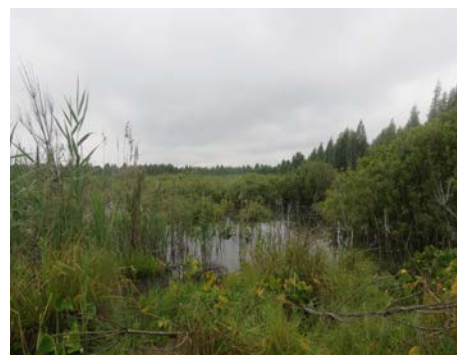

2016. General view

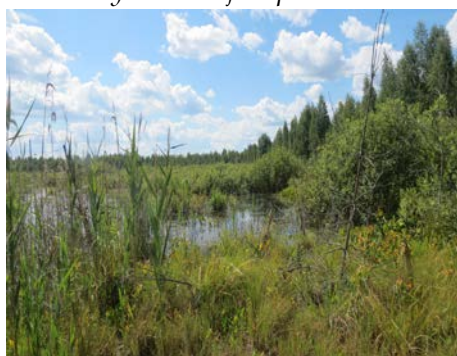

2017. General view

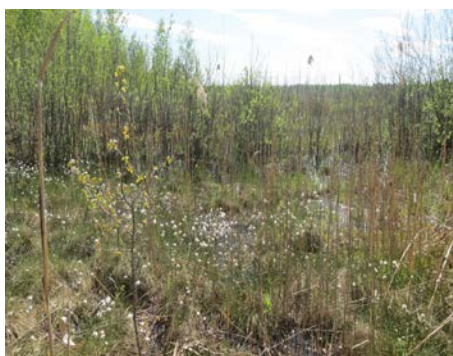

2018. General view

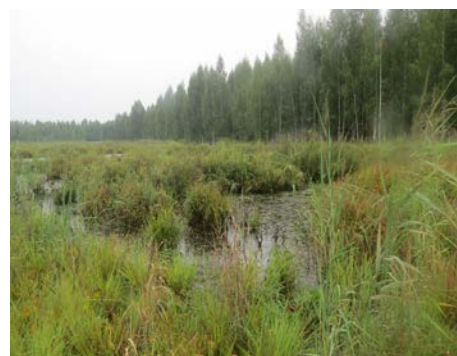

2021. General view



## Plot No. 2

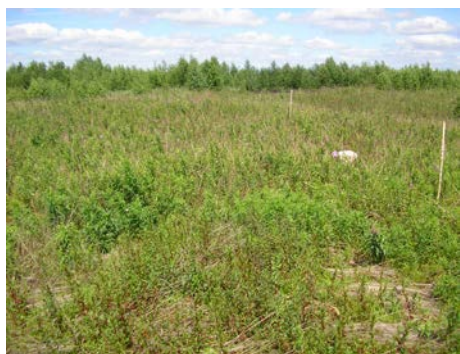

2005. General view with the plot

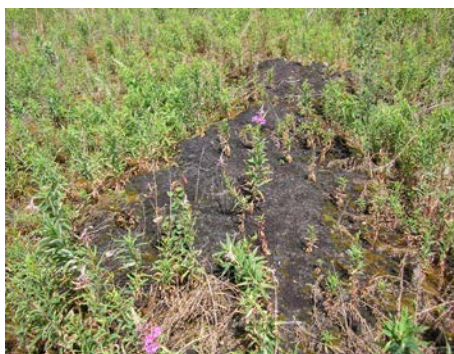

2005. Bare peat fragment

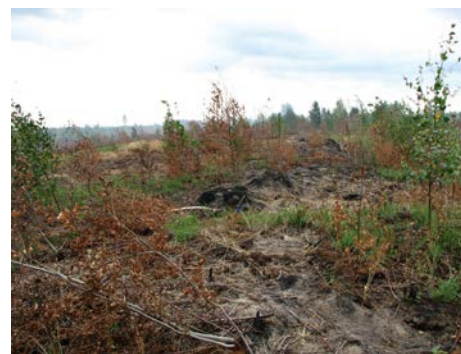

2007. After wildfire

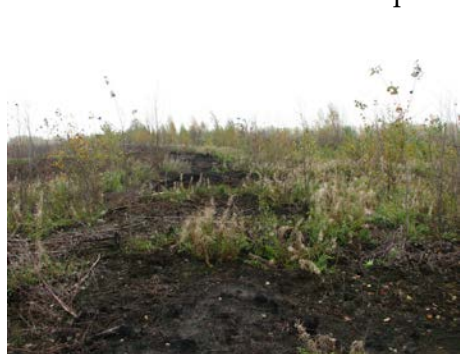

2007. After wildfire

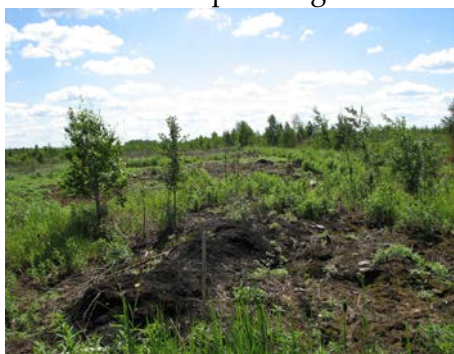

2008. Fragment of bare burnt peat

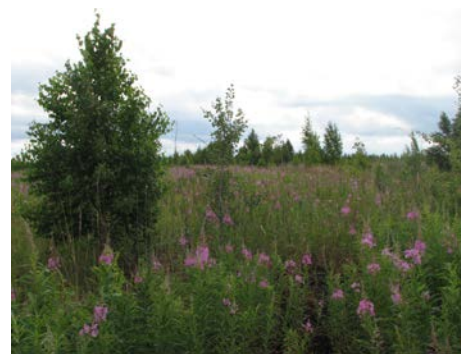

2009. General view

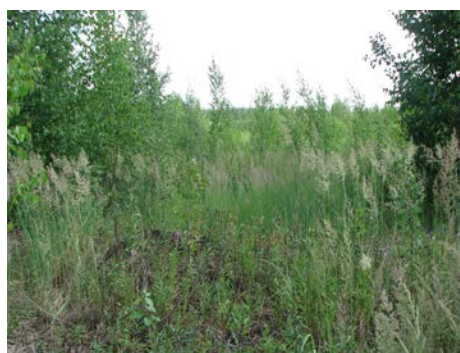

2010. General view

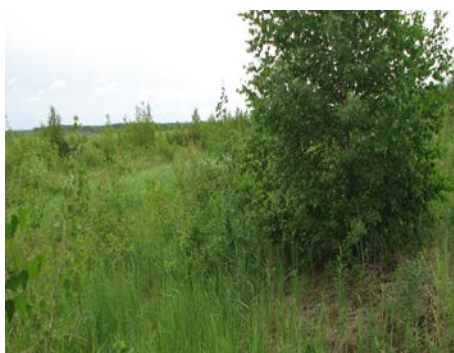

2011. General view

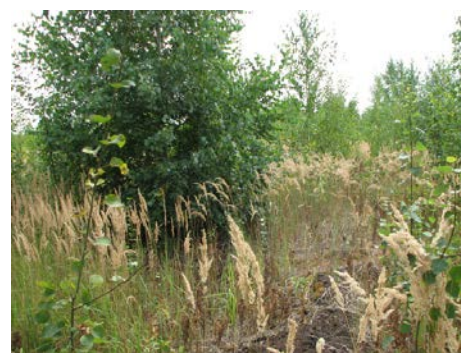

2012. General view

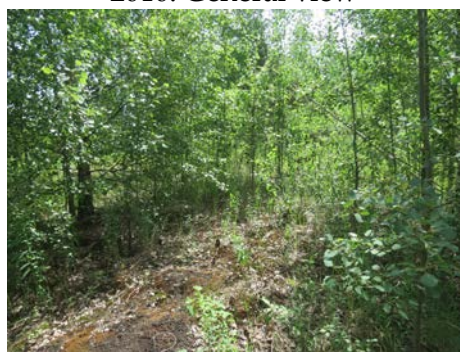

2017. General view

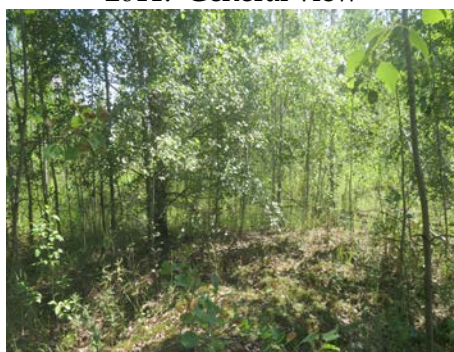

2018. General view

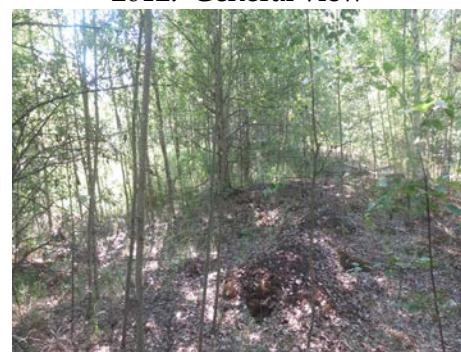

2021. General view

## Plot No. 3



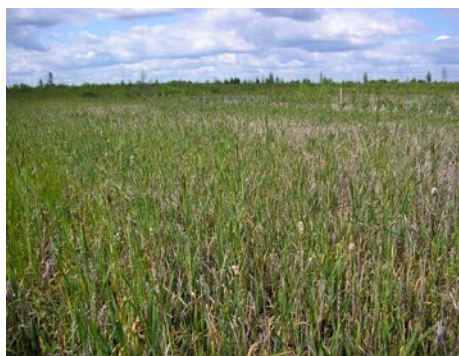

2005. General view

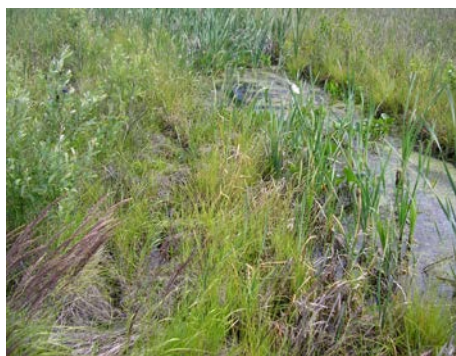

2005. *Salix cinerea* – *Carex cinerea*  
*Betula pubescens* – *Polytrichum*  
*juniperinum*

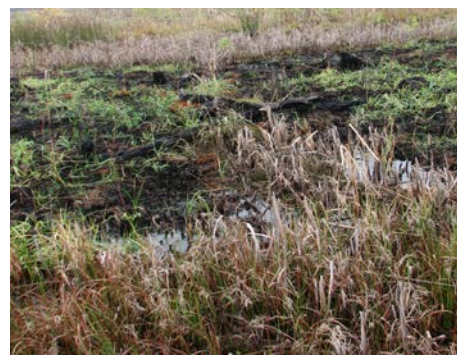

2007. After grass wildfire

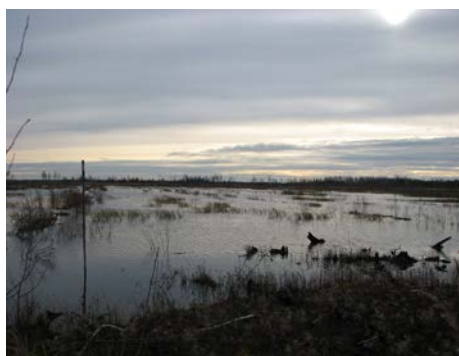

2008. After rewetting

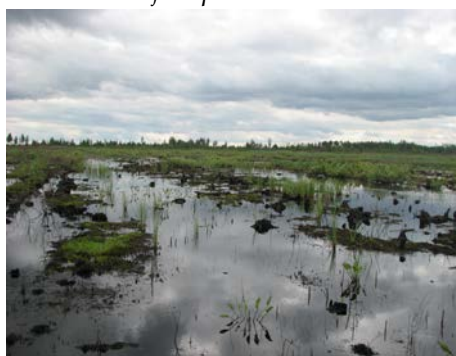

2009. General view

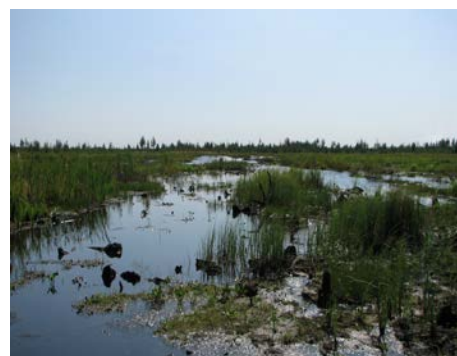

2011. General view

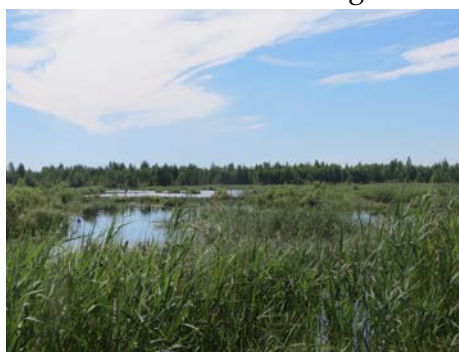

2016. General view

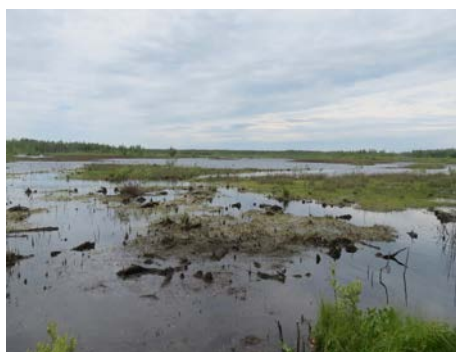

2018. General view

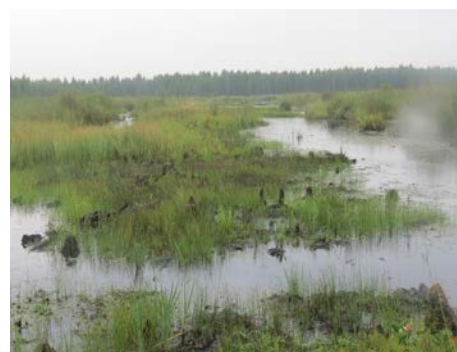

2021. General view



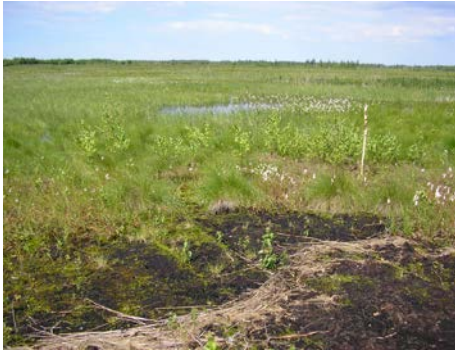

2005. General view with the plot

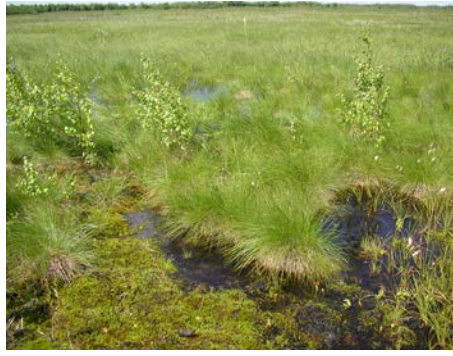

2005. Bare burnt peat and *Betula pubescens* – *Eriophorum vaginatum*

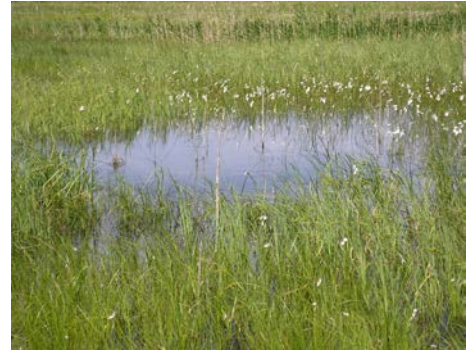

2005. Pool

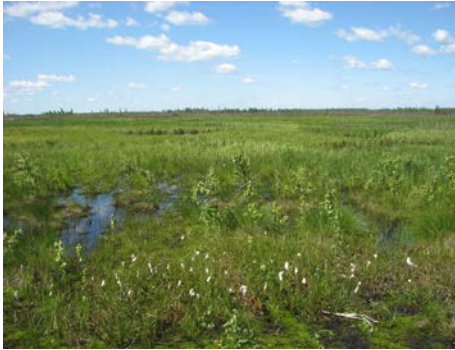

2008. General view

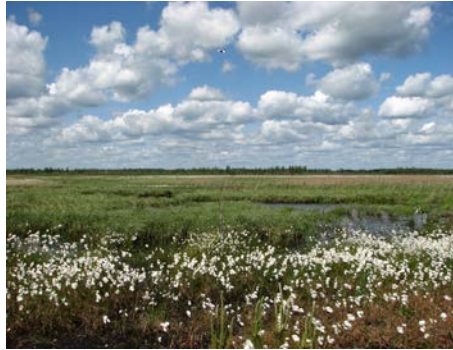

2009. *Eriophorum polystachion* - *Polytrichum juniperinum*

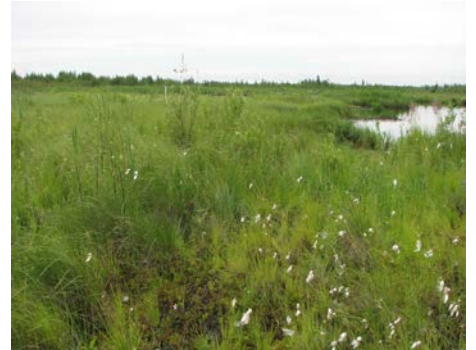

2011. *Carex rostrata* – *Sphagnum cuspidatum* u *Eriophorum polystachion* - *Sphagnum riparium*

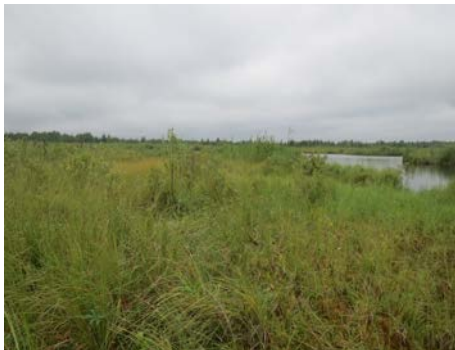

2016. *Carex rostrata* – *Sphagnum fallax*

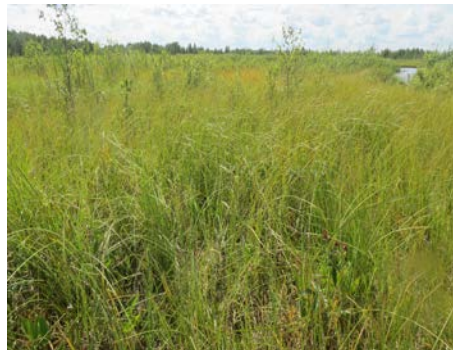

2017. *Carex rostrata* – *Sphagnum fallax* + *Sphagnum riparium*

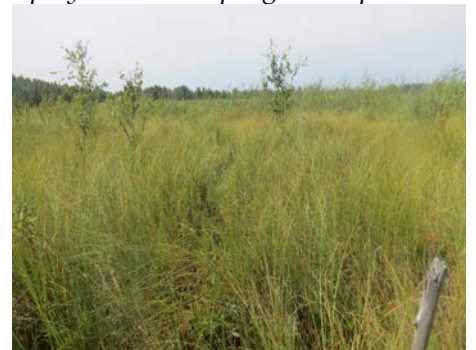

2021. *Carex rostrata* – *Sphagnum fallax*



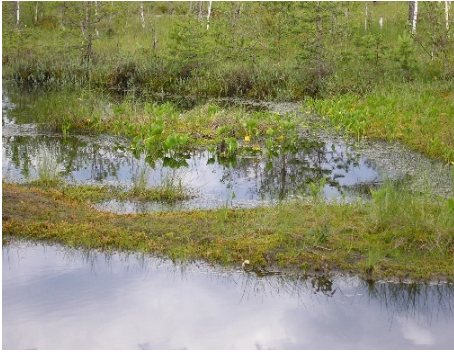

2005. Sphagnum carpet with *Eriophorum vaginatum* – *Sphagnum fallax*, in the background *Eriophorum polystachion* + *Calla palustris* – *Sphagnum fallax*

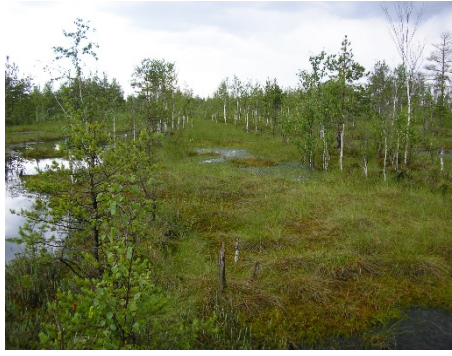

2005. Edge with *Pinus sylvestris* – *Vaccinium uliginosum* + *Eriophorum vaginatum* and Sphagnum carpet with *Eriophorum vaginatum* – *Sphagnum fallax*

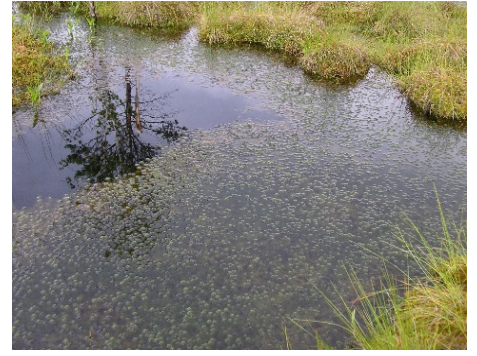

2005. Pool with *Sphagnum cuspidatum*

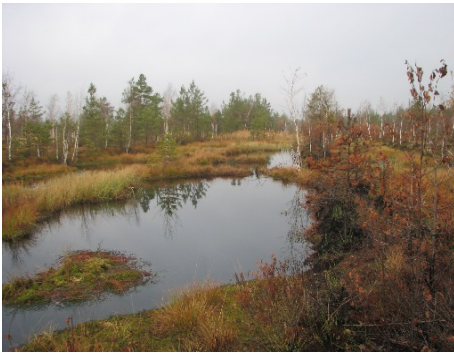

2007. Edge after the wildfire

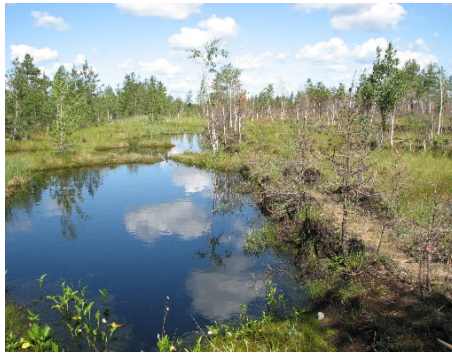

2008. Burnt edge and the pool

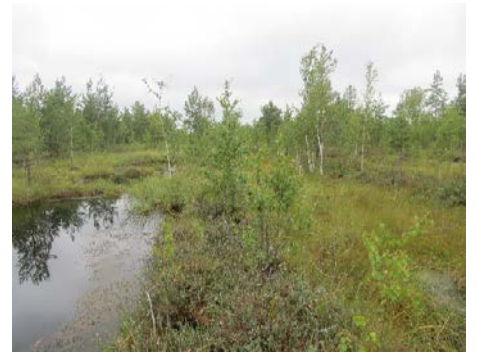

2016. Revegetation of the burnt edge

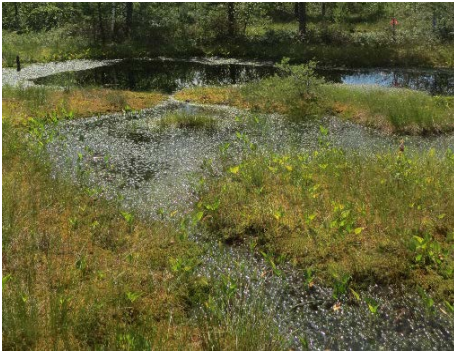

2017. Growth of the floating mat

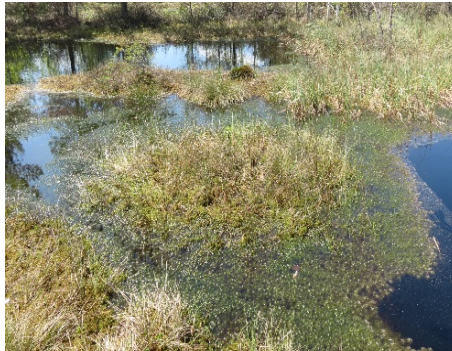

2018. Overgrowth of the pool with *Sphagnum cuspidatum*



**Plot No. 6**

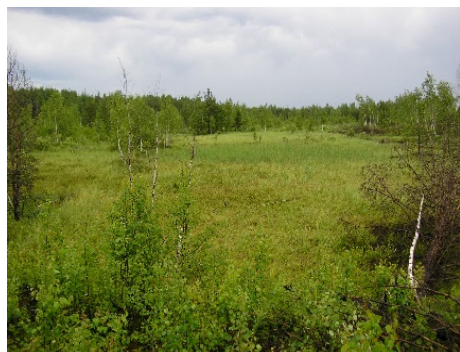

2005. General view

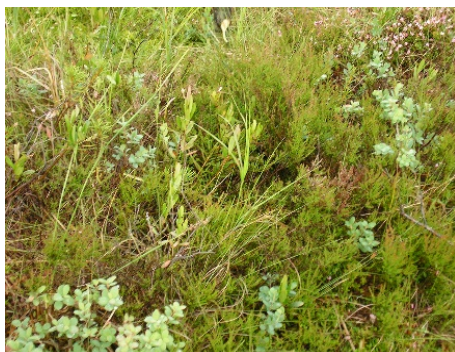

2005. *Vaccinium uliginosum* +  
*Calluna vulgaris* – *Sphagnum*  
*angustifolium*

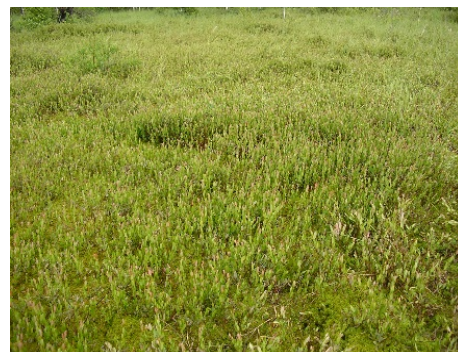

2005. *Chamaedaphne calyculata* –  
*Sphagnum fallax*

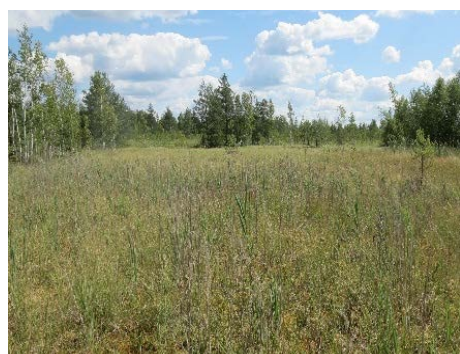

2017. General view

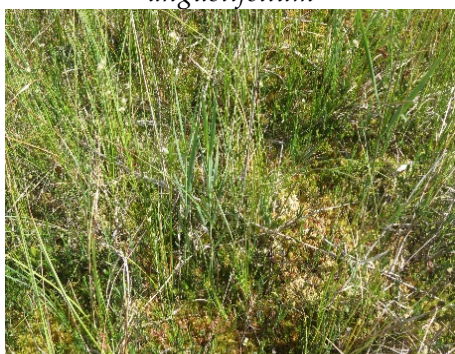

2018. *Chamaedaphne calyculata* –  
*Phragmites australis* – *Sphagnum*  
*fallax*

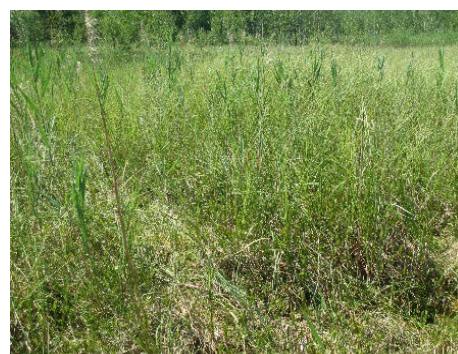

2021. *Chamaedaphne calyculata* –  
*Phragmites australis* – *Sphagnum*  
*fallax*



Plot No. 7

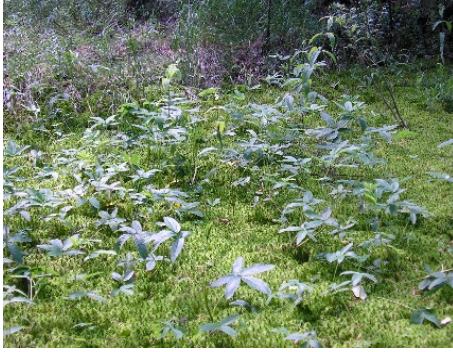

2005. *Comarum palustre* –  
*Sphagnum riparium*

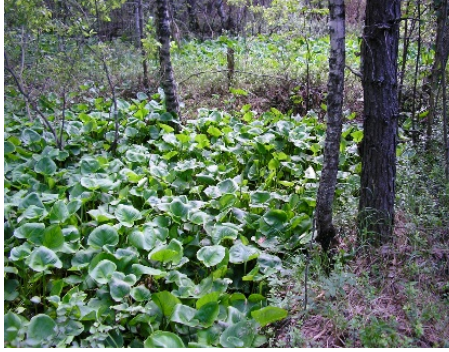

2005. *Calla palustris* – *Sphagnum*  
*riparium* (quarry) and *Pinus*  
*sylvestris* – *Vaccinium vitis-idaea*  
(edge)

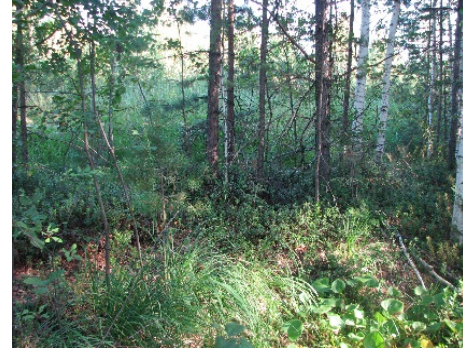

2012. *Pinus sylvestris* – *Vaccinium*  
*vitis-idaea* (edge)

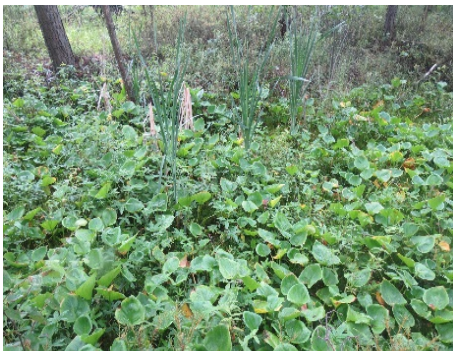

2016. *Calla palustris* – *Sphagnum*  
*riparium*

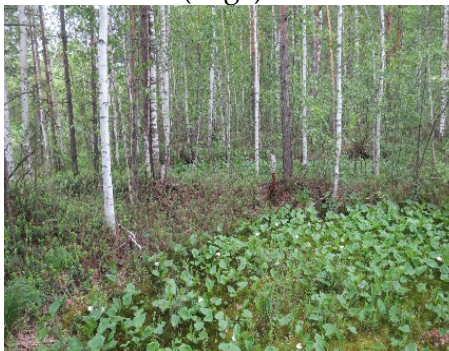

2018. *Calla palustris* – *Sphagnum*  
*riparium* (quarry) and *Pinus*  
*sylvestris* – *Vaccinium vitis-idaea*  
(edge)

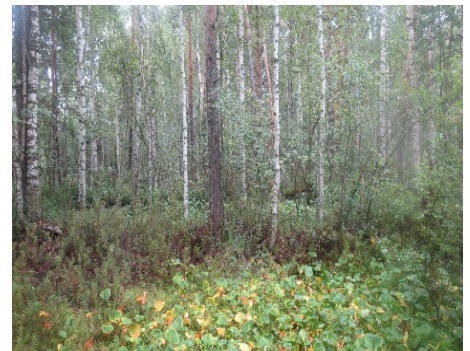

2021. *Calla palustris* – *Sphagnum*  
*riparium* (quarry) and *Pinus*  
*sylvestris* – *Vaccinium vitis-idaea*  
(edge)



**Plot No. 8**

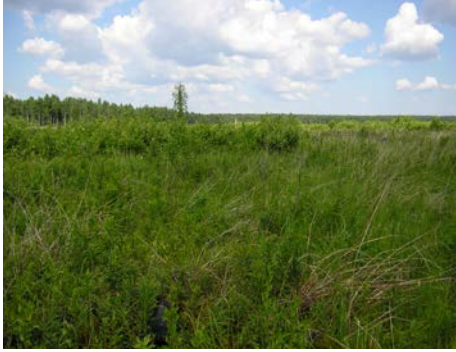

2005. General view

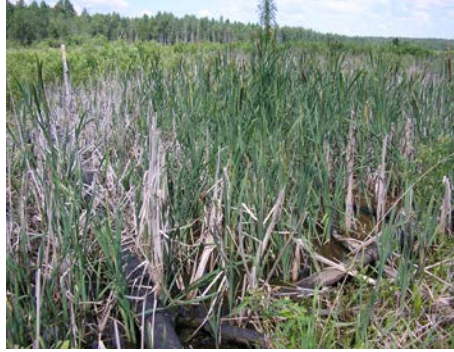

2005. *Typha latifolia*

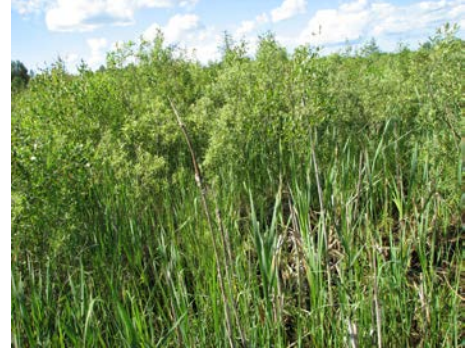

2008. General view

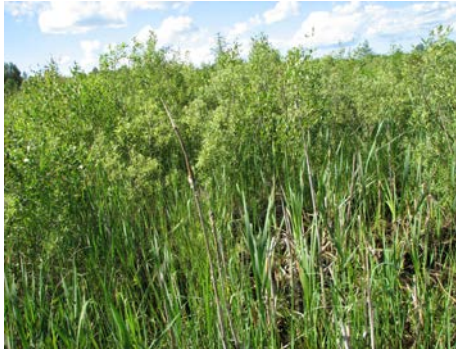

2008. General view

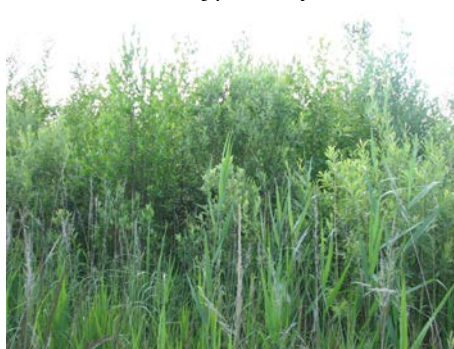

2009. General view

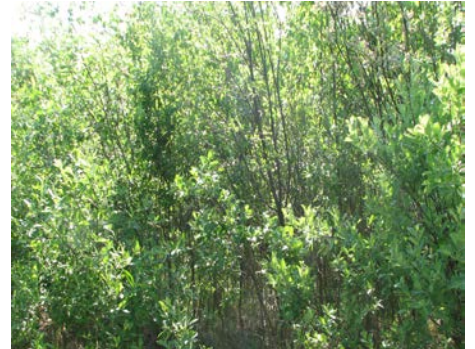

2011. General view

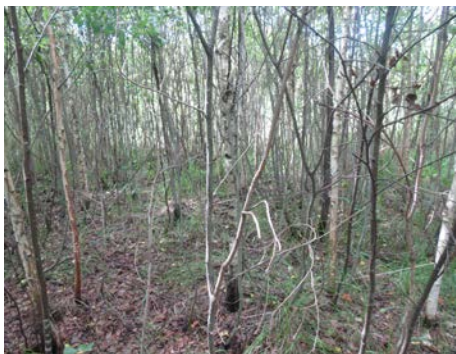

2016. General view

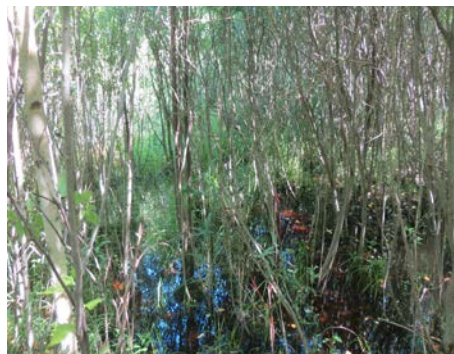

2017. General view

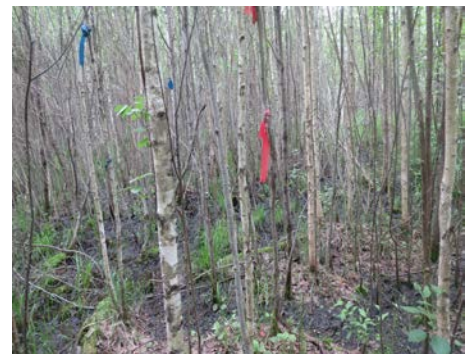

2021. General view



Plot No. 9

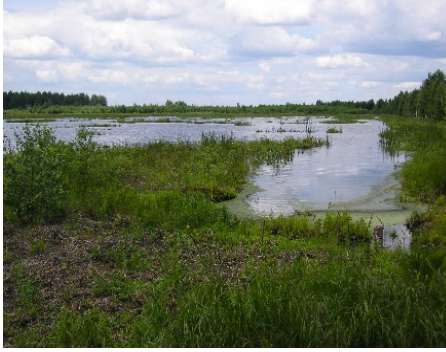

2005. General view

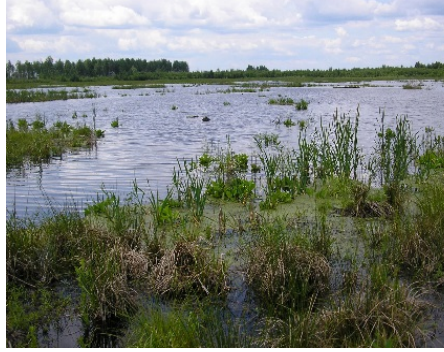

2005. Pool with single plants

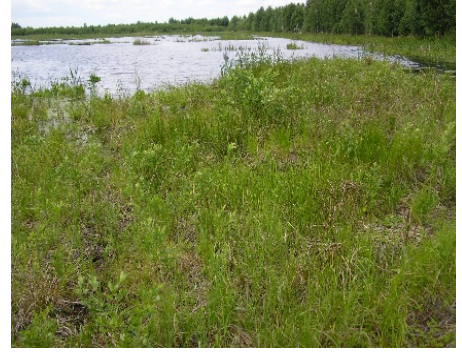

2005. *Salix cinerea* + *Salix myrtilloides* – *Calamagrostis neglecta* + *Lycopus europaeus*

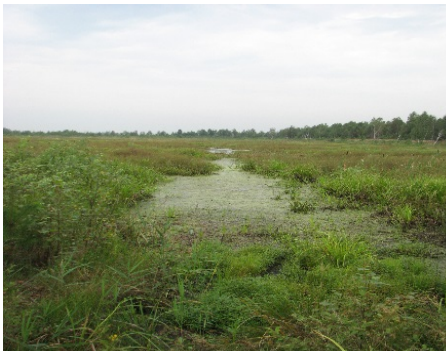

2008. General view

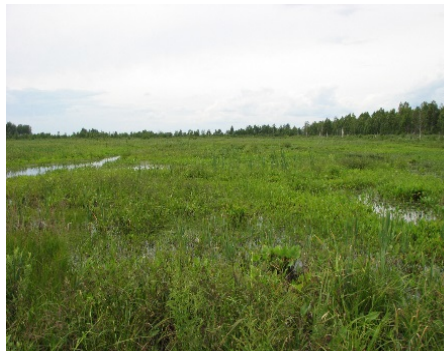

2008. Pool with *Alisma plantago-aquatica* + *Scirpus sylvaticus*; *Betula pubescens* – *Juncus conglomeratus* + *Calamagrostis epigejos*

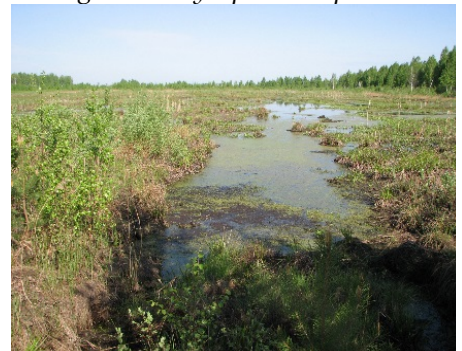

2009. General view

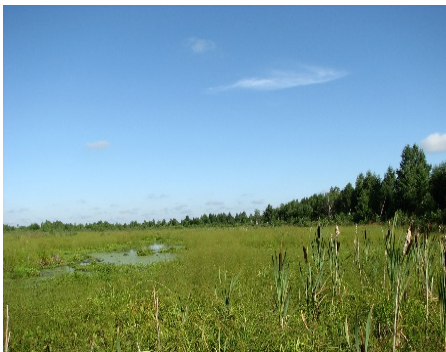

2009. *Scirpus sylvaticus* – *Bidens tripartita* and quack mire with *Typha latifolia*

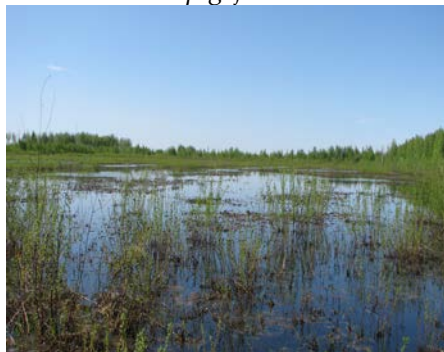

2011. General view after rewetting (spring)

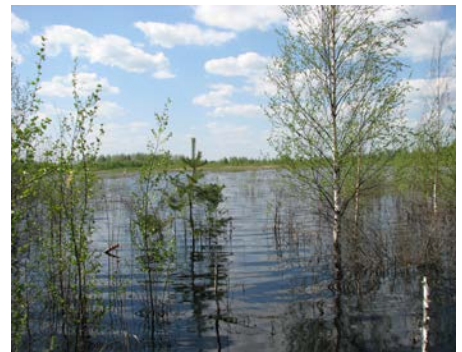

2012. Pool with single plants

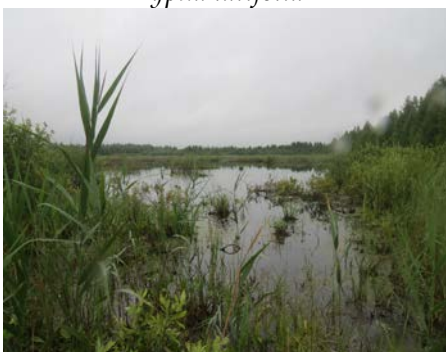

2016. General view

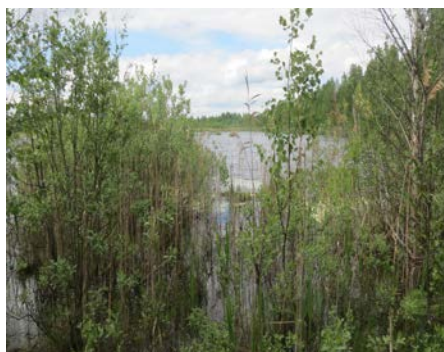

2017. General view

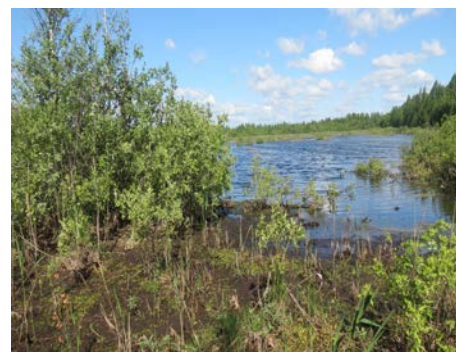

2018. General view



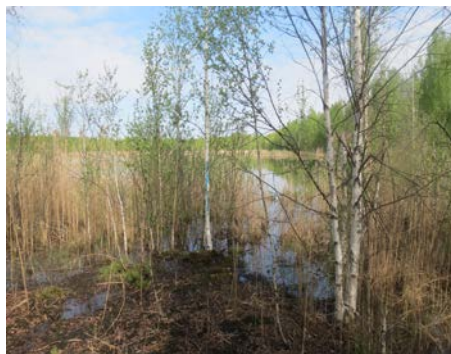

2021. General view

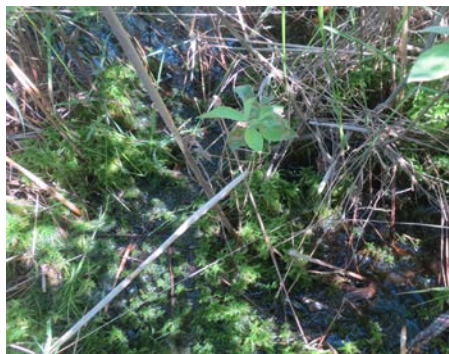

2021. *Sphagnum* mosses in coastal zone



**Plot No. 10**

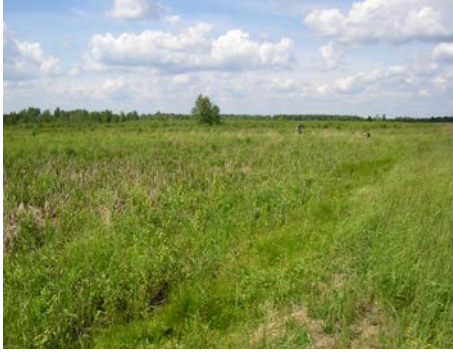

2005. General view

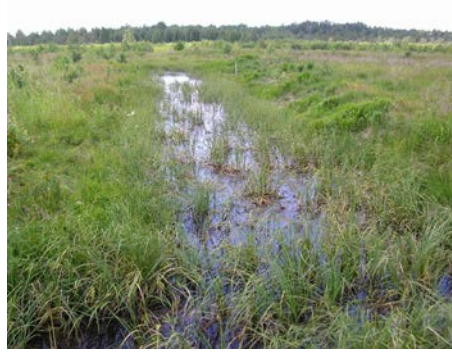

2005. *Carex rostrata* + *Juncus filiformis*

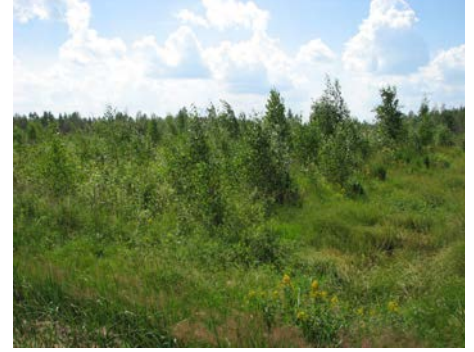

2008. General view

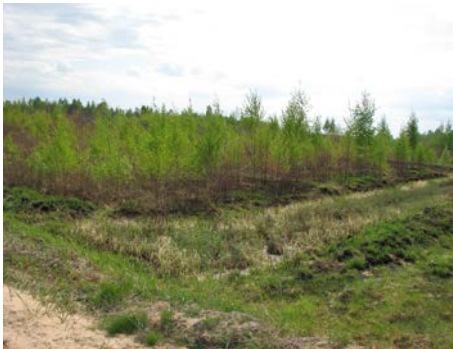

2009. After wildfire in spring

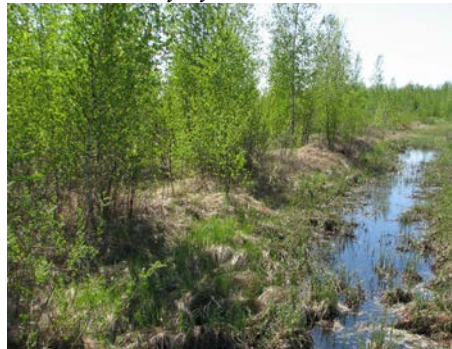

2011. *Carex rostrata* + *Comarum palustre*

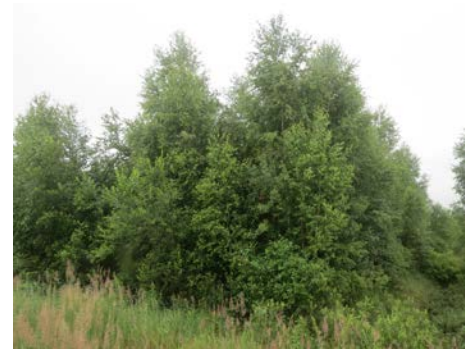

2016. General view

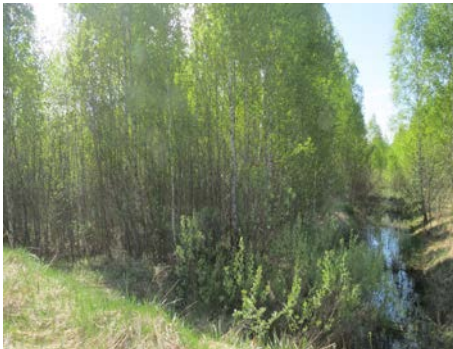

2018. Channel with *Comarum palustre* + *Carex rostrata*

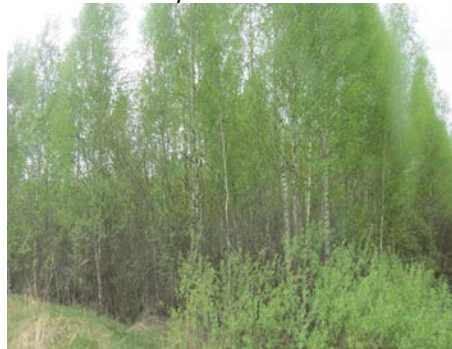

2021. General view



Plot No. 11

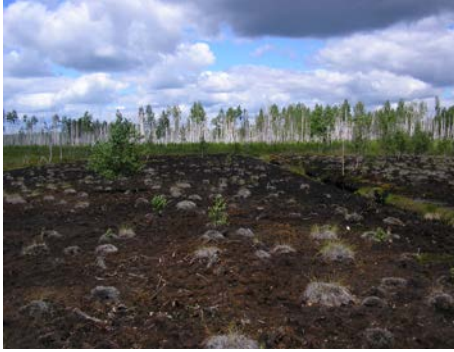

2005. Bare burnt peat with remains of cotton-grass tussocks

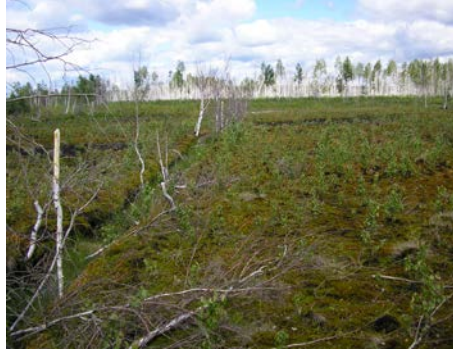

2005. Post-pyrogenic community  
*Betula pubescens* – *Eriophorum vaginatum* – *Polytrichum juniperinum*

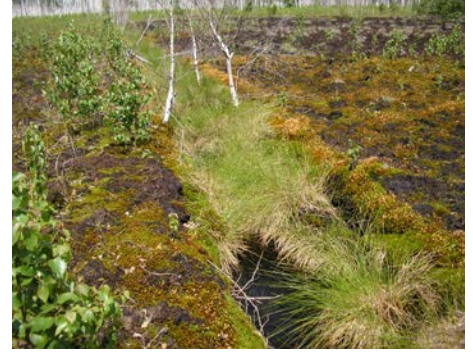

2005. Community with *Eriophorum vaginatum* (ditch)

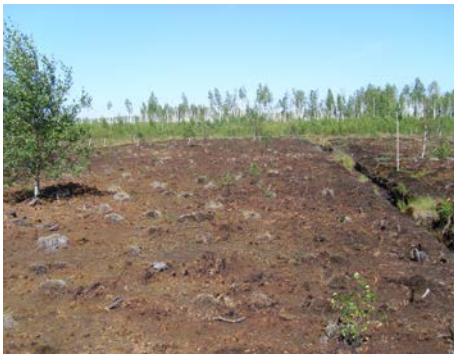

2007. After the wildfire in 2007.

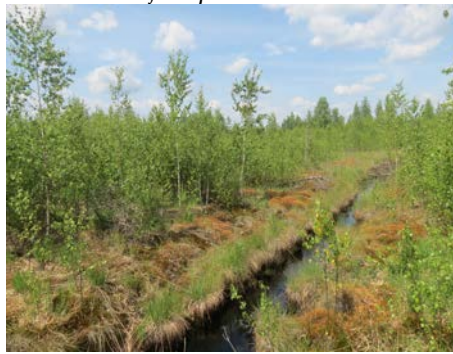

2016. General view

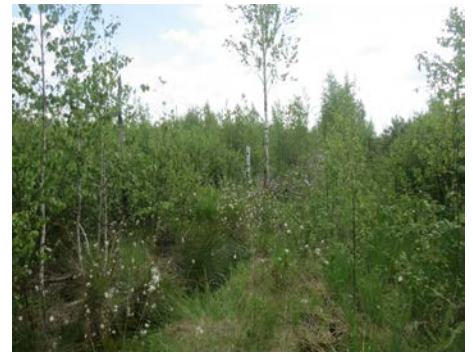

2016. *Betula pubescens* – *Vaccinium uliginosum* – *Polytrichum juniperinum*
